# Supplementary material for: Thermal Evaporation Synthesis of Vertically Aligned Zn2SnO4/ZnO Radial Heterostructured Nanowire Arrays
Source: Preprints.org preprint supplement (doi:10.20944/preprints202104.0718.v1), 2021-04-27
Supplement: Supplementary file 1 [file supplementary]

## **Supplementary Material for**

# **Thermal Evaporation Synthesis of Vertically Aligned Zn<sub>2</sub>SnO<sub>4</sub>/ZnO Radial Heterostructured Nanowire Arrays**

Gill Sang Han,<sup>1,a</sup> Min Jae Kang,<sup>2,3,a</sup> Yoo Jae Jeong,<sup>2,3</sup> Sangwook Lee,<sup>4,\*</sup> In Sun Cho<sup>2,3,\*</sup>

<sup>1</sup>School of Advanced Materials Science and Engineering, Sungkyunkwan University, Suwon 16419, South Korea

<sup>2</sup>Department of Materials Science and Engineering, Ajou University, Suwon 16509, South Korea

<sup>3</sup>Department of Energy Systems Research, Ajou University, Suwon 16509, South Korea

<sup>4</sup>School of Materials Science and Engineering, Kyungpook National University, Daegu 41566, South Korea

<sup>a</sup>These authors contributed equally.

\* Corresponding authors:

Sangwook Lee

Email: [wook2@knu.ac.kr](mailto:wook2@knu.ac.kr)

In Sun Cho

Tel: +82-31-219-2468; Fax: +82-31-219-1613; Email: [insuncho@ajou.ac.kr](mailto:insuncho@ajou.ac.kr)

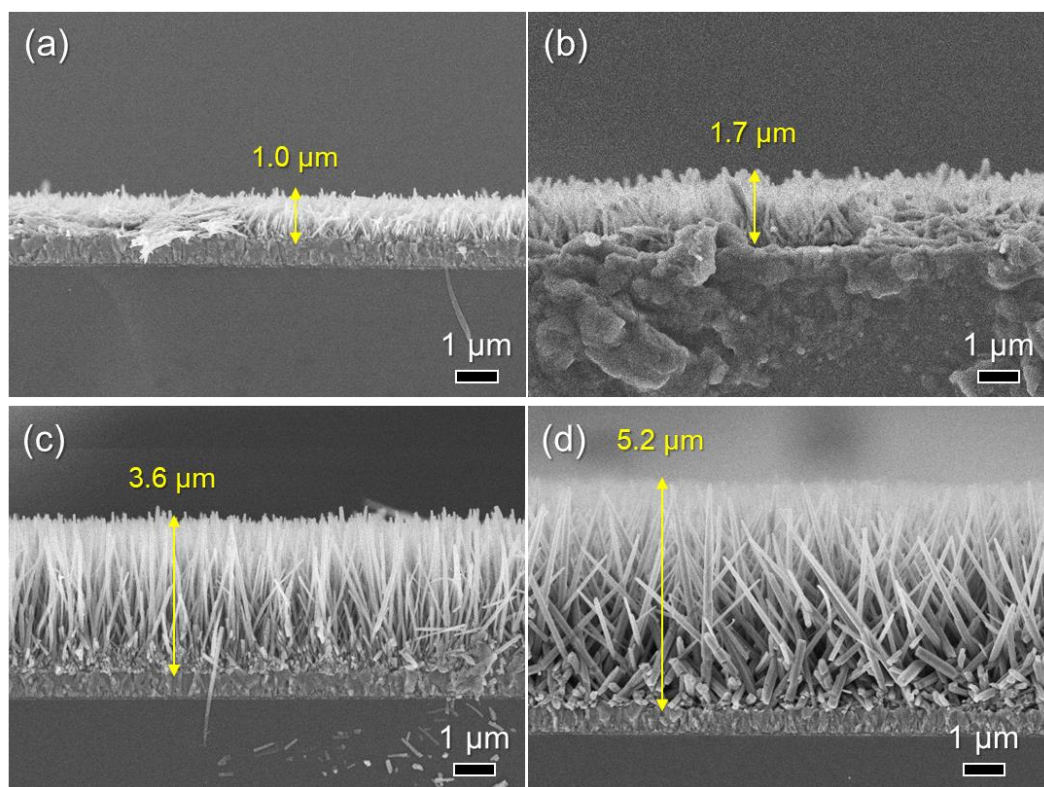

**Figure S1. Effect of  $\text{NH}_4\text{OH}$  amount on the morphology and length of ZnO NWs synthesized at 100 °C/2h with polyethyleneimine (PEI, 1 g) and addition of  $\text{NH}_4\text{OH}$  (a) 1 ml, (b) 2 ml, (c) 3 ml, and (d) 4 ml.**

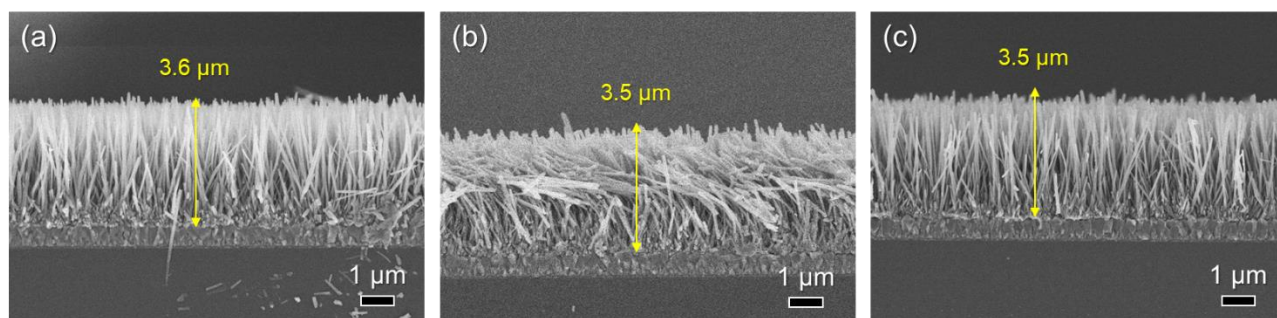

**Figure S2. Effect of growth time on the morphology and length of ZnO NWs synthesized at 100 °C with polyethyleneimine (PEI, 1 g) and addition of  $\text{NH}_4\text{OH}$  (3 ml). (a) 2 h. (b) 4 h. (c) 6 h. The growth time has little impact on the morphology and length of ZnO NWs.**

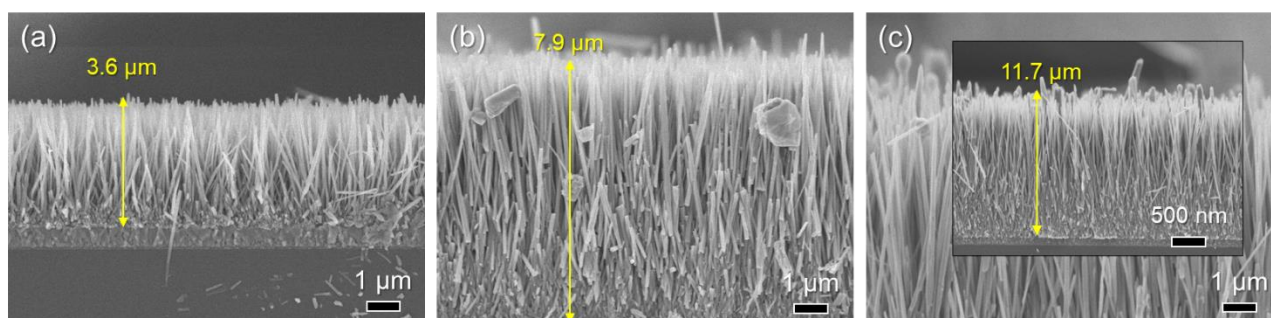

**Figure S3. Effect of growth cycle on the morphology and length of ZnO NWs synthesized at 100 °C/2 h with polyethyleneimine (PEI, 1 g) and addition of NH<sub>4</sub>OH (3 ml). (a) 1 cycle. (b) 3 cycles. (c) 5 cycles.**

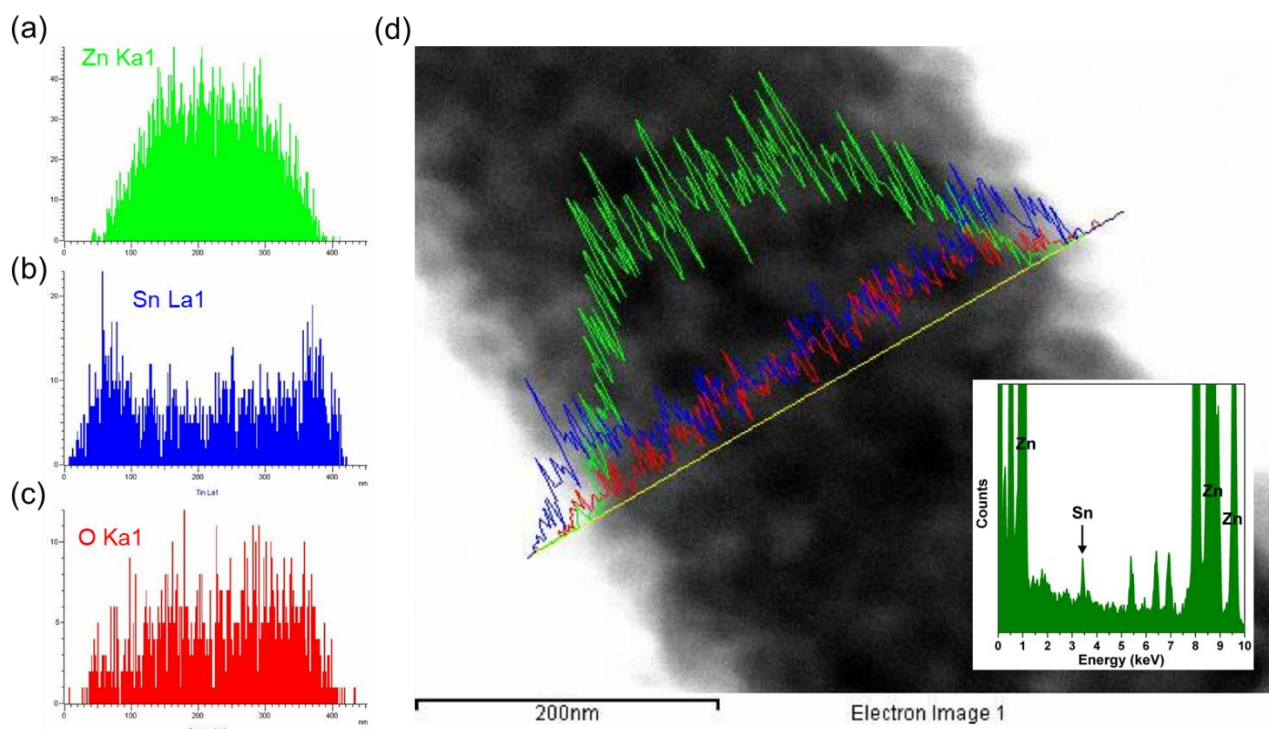

**Figure S4. TEM-EDS analysis of ZSO/ZnO NW.** (a-c) EDS line scan spectra. (d) STEM image. Inset shows EDS spectrum.



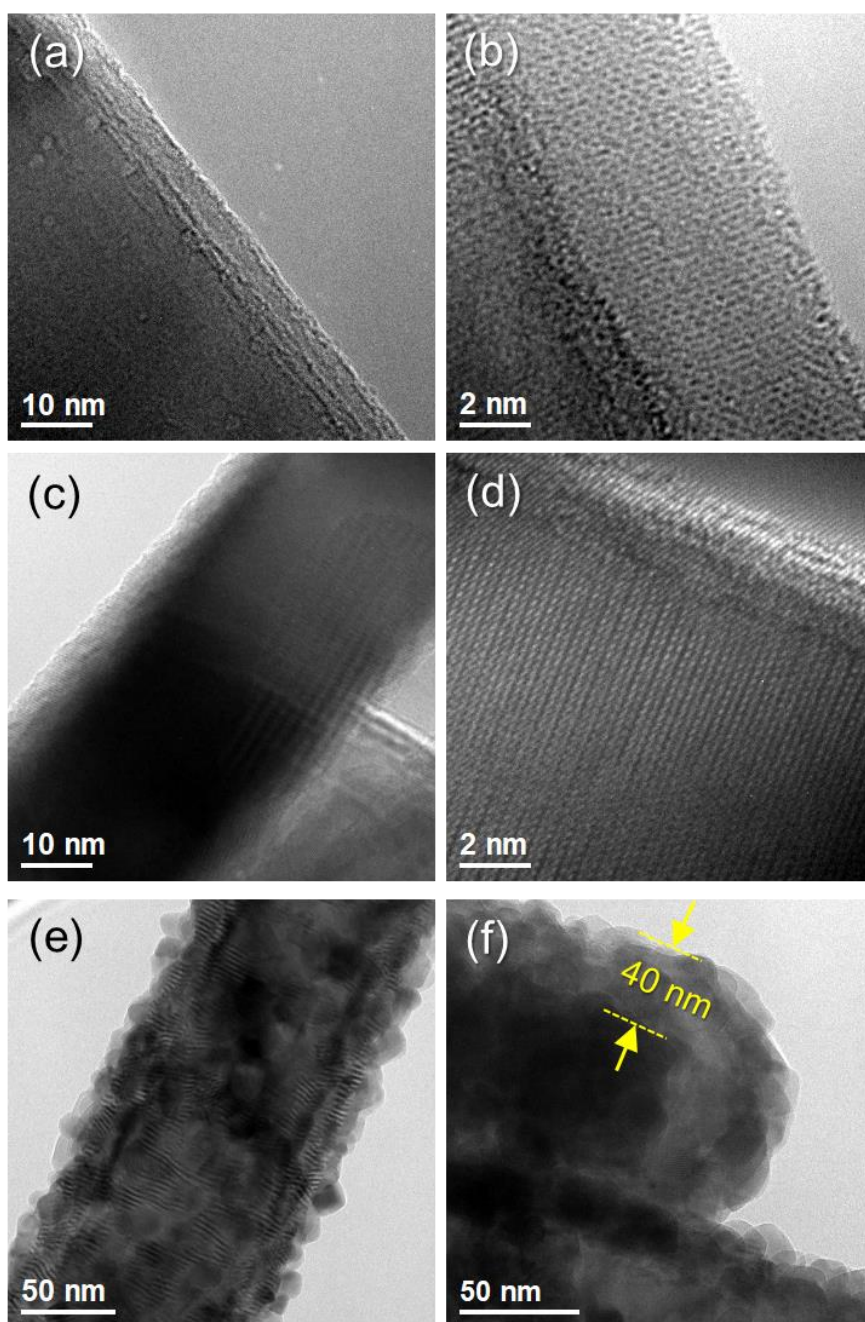

**Figure S5. TEM and HR-TEM images of ZSO/ZnO NWs.** (a,b) Zn/Sn evaporation for 30 min, without post-annealing. (c,d) Zn/Sn evaporation for 30 min, with a post-annealing at 550 °C/1h. (e,f) Zn/Sn evaporation for 2 h, with a post-annealing at 550°C/1h.

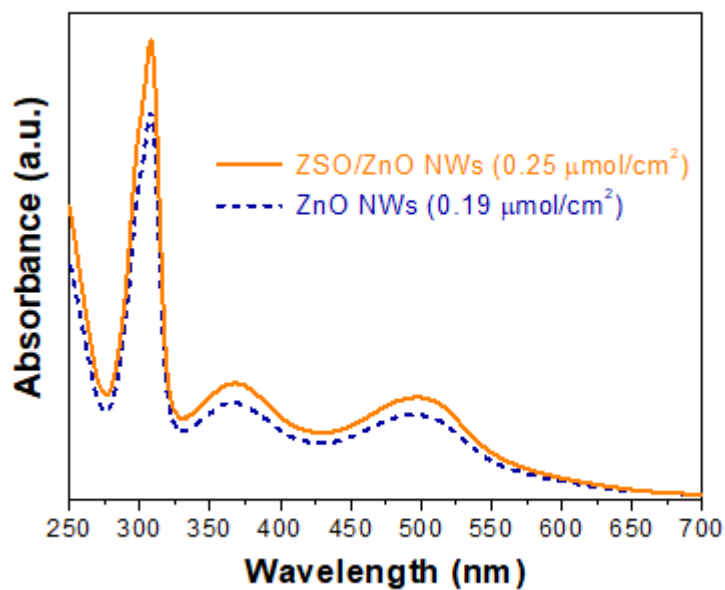

**Figure S6.** Amount of dye adsorption (N719) measurement by UV-Vis spectroscopy. The ZSO/ZnO HNA exhibited 130% larger dye adsorption, indicating a larger surface (or surface roughness) area than the ZnO NW.
